# Supplementary material for: zic-1 Expression in Planarian Neoblasts after Injury Controls Anterior Pole Regeneration
Source: PubMed Central journal article supplement (PMC4081000; doi:10.1371/journal.pgen.1004452), 2014-07-03
Supplement: pgen.1004452.s012.pdf [file pgen.1004452.s012.pdf]

Table S2. qPCR fold-change values in X1 cells after zic-1 RNAi

| mRNA probed | log <sub>2</sub> (FC) zic-1 RNAi vs control |       |       | p-value (2-tailed T-test) |         |         |
|-------------|---------------------------------------------|-------|-------|---------------------------|---------|---------|
|             | 0h                                          | 24h   | 48h   | 0h                        | 24h     | 48h     |
| ovo         | -2.17                                       | -1.40 | -1.67 | 0.00158                   | 0.02049 | 0.00182 |
| zic         | -1.85                                       | -1.17 | -2.24 | 0.00004                   | 0.08325 | 0.09153 |
| notum       | -1.26                                       | -0.19 | -2.05 | 0.07840                   | 0.20451 | 0.03705 |
| hmx-1       | -0.82                                       | -1.72 | -0.97 | 0.17517                   | 0.10500 | 0.12510 |
| dlx         | -0.95                                       | -1.13 | -0.81 | 0.07484                   | 0.00126 | 0.07144 |
| sp6/9       | -1.03                                       | -0.05 | -0.01 | 0.06196                   | 0.76045 | 0.97402 |
| OtxA        | -0.61                                       | -0.06 | -0.05 | 0.11256                   | 0.92091 | 0.91337 |
| pax6A       | -0.64                                       | -0.10 | -0.09 | 0.00665                   | 0.65885 | 0.82223 |
| soxB        | -0.49                                       | -0.10 | 0.12  | 0.00283                   | 0.77651 | 0.80063 |
| runt-1      | -0.50                                       | -0.19 | 0.29  | 0.04359                   | 0.52839 | 0.22042 |
| six1-2      | -0.34                                       | 0.03  | 0.17  | 0.11294                   | 0.94451 | 0.66348 |
| six3-1      | -0.62                                       | 0.04  | 0.39  | 0.02089                   | 0.84524 | 0.20175 |
| sim         | -0.09                                       | 0.14  | 0.24  | 0.63697                   | 0.65324 | 0.24277 |
| coe         | -0.04                                       | 0.21  | 0.40  | 0.81728                   | 0.58962 | 0.62987 |
| ap2         | -0.28                                       | -0.04 | 0.77  | 0.29528                   | 0.92250 | 0.02467 |
