# Supplementary material for: zic-1 Expression in Planarian Neoblasts after Injury Controls Anterior Pole Regeneration
Source: PubMed Central journal article supplement (PMC4081000; doi:10.1371/journal.pgen.1004452), 2014-07-03
Supplement: pgen.1004452.s013.pdf [file pgen.1004452.s013.pdf]

Table S3, primers used for realtime PCR

| <b>gene</b>            | <b>left primer</b>        | <b>right primer</b>       |
|------------------------|---------------------------|---------------------------|
| Smed_coe               | CTTCATCTGGTCACGGGAGT      | CTTCATCTGGTCACGGGAGT      |
| Smed_eya               | GTCCACCAACAAATCCTTCG      | GTCCACCAACAAATCCTTCG      |
| Smed_hesl-3            | GGCAGAGCTCAAAGAATTGG      | GGCAGAGCTCAAAGAATTGG      |
| Smed_otxA              | GCAGCAAATCAACTGCAAAA      | GCAGCAAATCAACTGCAAAA      |
| Smed_pax6A             | GGCAGCAAACCAAGAGTAGC      | GGCAGCAAACCAAGAGTAGC      |
| Smed_sim               | AGGCATTTCGCATCAAACCTCT    | AGGCATTTCGCATCAAACCTCT    |
| Smed_six1-2            | GATTTGGGACGGTGAAGAAA      | GATTTGGGACGGTGAAGAAA      |
| Smed_six3-1            | GATAAATATCGTGTCCGGAAAAAG  | GATAAATATCGTGTCCGGAAAAAG  |
| Smed_soxB              | TCAAGGCCCATTTCAATCTC      | TCAAGGCCCATTTCAATCTC      |
| Smed-ap2               | CACAGATTTACTCAACAAGGATCG  | CACAGATTTACTCAACAAGGATCG  |
| Smed-distalless        | CCAGTCGGGCTATCAGTACTATTT  | CCAGTCGGGCTATCAGTACTATTT  |
| Smed-otp               | ACGATAAATCTTCACCGAACAAAT  | ACGATAAATCTTCACCGAACAAAT  |
| Smed-pax6A             | GGTTCAAACGGAACAAGTTCTACT  | GGTTCAAACGGAACAAGTTCTACT  |
| Smed-runt-1            | GAAGCAAGATTCAATGACTTGAGA  | GAAGCAAGATTCAATGACTTGAGA  |
| Smed-sp6-9             | ACTTTCAGTCTATTCCTGCAAAC   | ACTTTCAGTCTATTCCTGCAAAC   |
| Smed-tyrosine kinase-3 | ATTTATCCAGCATAACGGAGACTTC | ATTTATCCAGCATAACGGAGACTTC |
| Smed-wntP-3            | GGAATACAGGAATGTCAACATCAA  | GGAATACAGGAATGTCAACATCAA  |
| Smed-zicA              | AAATCTTGGTGGATTTTGCTATTC  | AAATCTTGGTGGATTTTGCTATTC  |
| ASS1                   | CTAGTCCTGACCAACCTGAGAAAT  | CTAGTCCTGACCAACCTGAGAAAT  |
| CAPN9                  | TAATGTTCGAAATTTGTCAAAGGA  | TAATGTTCGAAATTTGTCAAAGGA  |
| FBXL4                  | ATGTCTATTCGATTTTCGGGATTA  | ATGTCTATTCGATTTTCGGGATTA  |
| h2b                    | GTAAGTAGCGTCAAAATCTGCAA   | GTAAGTAGCGTCAAAATCTGCAA   |
| BPKG17873              | CAGCAATACCCGATAATTATGACA  | CAGCAATACCCGATAATTATGACA  |
| BPKG22608              | CAAACATAAAAGCGTCATAGACCA  | CAAACATAAAAGCGTCATAGACCA  |
| BPKG40848              | TGCTTTATGGAAATAAACAGGTCA  | TGCTTTATGGAAATAAACAGGTCA  |
| BPKG47437              | GTGACAAAAATGAACAAGAGGAAT  | GTGACAAAAATGAACAAGAGGAAT  |
| Gene_12607_1/1         | AGAAACATTCTAGTCGGCGATAAC  | AGAAACATTCTAGTCGGCGATAAC  |
| isotig25105            | AGAAATGATCACATCGACGACTAA  | AGAAATGATCACATCGACGACTAA  |
| isotig26419            | ACACTCAATCTGGTAGATCACGAA  | ACACTCAATCTGGTAGATCACGAA  |
| PDZRN4                 | TGTGGAGATCTGTAAAAATCGAA   | TGTGGAGATCTGTAAAAATCGAA   |
| TNS1                   | ATATTCAGGAGCTTATGGACTTGC  | ATATTCAGGAGCTTATGGACTTGC  |
| znf840                 | AATATTCGCTAAATGGCCTACAG   | AATATTCGCTAAATGGCCTACAG   |
